# Supplementary material
Source: PubMed Central journal article supplement (PMC9042317)
Supplement: NIHMS1643626-supplement-11.pdf [file NIHMS1643626-supplement-11.pdf]

# SUPPLEMENTARY TABLE 1. gRNA target and donor vector sequence for 1<sup>st</sup> editing.

1<sup>st</sup> edit gRNA target: CGGAGCGCGCGTAGTGCACC

## Sequence of GSX2 1st donor vector (6778 bp):

TATATATGAGTAAACTTGGTCTGACAGTTA**CCAATGCTTAATCAGTGAGGCACCTATCTCAGCGATCTGTCTATTTTCGTTTCCATCATAGTTGCCCTGACTCCCCGT**  
**CGTGTAGATAACTACGATACGGGAGGGGCTTACCATCTGGCCCCAGTGTGCAATGATACCGCGAGACCCACGCTCACCGGCTCCAGATTTATAGCAATAAAAC**  
**CAGCCAGCCGGGAAGGGCCGAGCGCAGAAGTGGTCTGCAACTTTATCCCGCTCAATCCAGTCTATTAATTTGTTGCCGGGAAGCTAGAGTAAGTAGTTCGCCA**  
**GTTAATAGTTTGGCAACGCTTGTGCCATTGCTACAGGCATCGTGGTGTACCGCTCGTGGTTGGTATGGCTTCAATCAGCTCCGGTCCCAACGATCAAGGC**  
**GAGTTACATGATCCCCATGTTGTGCAAAAAAGCGGTTAGCTCCTTCGGTCTCCGATCGTGTGCAGAAGTAAGTTGGCCGCAAGTGTATCACTCATGGTTATG**  
**GCAGACTGCCATAAATCTCTACTGTCATGCCATCCGTAAGATGCTTTTCTGTGACTGGTGAAGTACTCAACCAAGTCATTCTGAGAATAGTGTATGCCGGCAGCC**  
**GAGTTGCTCTTGGCCGGGCTCAATACGGGATAATACCGCGCCACATAGCAGAACTTTAAAGGTGCTCATCATTGGAAAACGTTCTTCGGGGCGAAAACCTCA**  
**AGATCTTACCGCTGTTAGATGTCAGTTCGATGTAAACCCTCGTGCACCCACTGTACTTCAGCATCTTTTACTTTCCAGCAGCTTTCTGGGTGAGCAAAAAC**  
**AGGAAGGCAAAATGCCGCAAAAAAGGGAATAAGGGCGACACGAAATGTTGAATACTCATACTCTTCTTTTCAATATTATTGAAGCATTATCAGGGTTATTG**  
**TCTCATGAGCGGATACATATTTGAATGTATTTAGAAAAATAACAATAAGGGGTTCCGCGCACATTTCCCGGAAAAGTGCCACCTGACGTTAACTCGAGCACA**  
**CGCACCTGTGCACCGCCACCTACAACCTGGCGGACCCCGGAGATTCACCTGCCATGCCATGGGTAGGGCGGGGCTTTGGGACCTCCGCTCCG**  
**CGCTTTCCGCGCTCCTGGAGCAAACTTCCACCTCCAGTGGAGGAAGTGGGAGCCCGGGACAGGGTGAAGAGAGAGGACGGGCTTTAGTGTAACTGTAG**  
**AGTCAGCCACAGAATCCACGAAAGTGAAGTGTAGTTGCCAGCTTCCACTCAGCCTGGTGCCTTTACTCTAGTAGTAGGTGCTCGAGTATTGCCTTAT**  
**TAATCTGGGCGCTTAGGGCTCGAAGCTCACGGCGGAGAAAACCGAGTTAACTGCTTGGGATTTGGGTTGGTGTGTTTGAACCTGTGGGCATCCCG**  
**GCTCGGGGCGGGTAAAGCGCTTACGCTTTTGGCTAAGCTGCGCGCTTCCGCTTGGCTAAAGGGAGGGCGATCAGATAGTGCAGCCCCCTCCCTCT**  
**TTAATCTGTGACTTCGCATCCGATCGAGCCTTTATTTGCTTGCCTGCTCTTTTCTTCCCGCTAAGCAACCCAGTGTGCTTAAATGGGAAGCGGA**  
**TACAGATGTTCCGGTGGGCTTCCCGGGTGGTCCCTGAAATGCGTCTGGTTAGCACATGGGGTGGGAGCACCTTCCCGAGCCTTACCTCTTACCCTCT**  
**CTTCCGCGGTCGCGAGGAGGCTGTGACGCGCAGCCAGGTACCCAAATGGCAAGAGGATGAGGACGGCGTTCACTAGCAGCCAACTCTGGAGCTGGAGAGAGA**  
**ATTCTCTTCAACATGTACCTGTCTCGACTCCGGAGGATTAATCGCCACTTACCTGAACCTGTCGGAGAAGCAGGTGAAAATCTGGTTTCCAGAACCCCGGA**  
**GTGAAGCACAAGAAGGAGGGGAAGGGCAGCGCAGAGGAACAGTACGCGGGCTGCAAGTGCCTCGGGAGCCAGGTCATCCATGAGCGGCAGTGCCTTCC**  
**CGCGCGGGTTTTGGCGCTCCCGGGGCGCCCCCTCTCACGGCGAGCGCTGCCACGTGACGCAAGGGCGCAGCGAGCGTCTGATCCTTCCGCCCCG**  
**ACGCTCAGGACAGCGGCCCGCTGCTCATAAGACTCGGCCCTTGAACCCAGTATCAGCAGAAGGACATTTTAGGACGGGACTTTGGGTGACCTAGGCGACTG**  
**GTTTTCTTCCAGAGAGCGGAACAGCGGAGGAAAAGTAGTCCCTTCCGGGACTTCCGCGGAGGATCTCCGTTGGGCGGGTGAACCGCGATGATTATAAAG**  
**GACGCGCCGGGTGTGGCAGCAGTAGTTCGCTCGCAGCCGGATTTGGGTCCGGTCTTGTGTTGTGGATCGCTGTGATCGTGGTGGTGGTGGTGGTGGT**  
**GCTGGGCTGGCCGGGCTTTCGTGGCCGCGGGCGCTCGGTGGGACGGAAGCGTGTGGAGAGACCCCAAGGGCTGTAGTCTGGTCCGCGAGCAAGG**  
**TTGCCCTGAACTGGGGGTTGGGGGGAGCGCAGCAAAAATGGCGGCTGTCCCGAGTCTTGAATGGAAGACGCTTGTGAGGCGGGCTGTGAGGTGTTGAAAC**  
**AAGTGGGGGGCATGGTGGGGCGCAAGAACCAGGCTTTCGAGCCCTCGCTAATCGCGGAAAGCTCTTATTCGGGTGAGATGGCTGGGCGACCATCTGG**  
**GGACCCTGACGTGAAGTTTGTCACTGACTGGAAGAAGTCCGTTTGTCTGTGTTGGCGGGGGCGCAGTTATGGCGGTGCCGTTGGGCAGTGCACCCGTACCT**  
**TGGGAGCGCGCCCTCGTGTGCTGACGTCACCCCTTCTGTTGGCTATAATGCAAGGTTGGGGCCACCTGCCGTAAGGTGTGCGGTAGGCTTTTCTCC**  
**GTCCAGGAGCGAGTGTTCGGGCTAGGGTGGGCTCTCCTGAACTCGACAGCGCCGGACCTCTGGTGAAGGGAGGGATAAGTGAGGGCTCAGTTTCTTTGG**  
**TCGGTTTTATGACATCTCTTAAAGTAGCTGAAGCTCCGGTTTTGAACTATGCGCTCGGGGTTGGCGAGTGTGTTTTGTGAAGTTTTTAGGCCACTTTTGA**  
**ATGTAATCATTGGGTCAATATTTTCAAGTGTAGACTAGTAAATTTCCGCTTAAATTTCCGGCTTTTGGCTTTTTTGTAGACGGTACCGAGCTTCTCG**  
**AAGGATCCATGCCACCATGGTGTCTAAGGGCGAAGAGCTGTTACCGGGGGTGGTGGCCATCTGGTCGAGCTGGACGGCAGCTAAACGGCCACAAGTTC**  
**AGCGGTGTCCGGCGAGGGCGGAGGGCGATGCCACCTACGGCAAGCTGACCCCTGAAGTTCATCTGCACCCAGCGCAAGCTGCCCGTGGCCACCCCTCG**  
**TGACCACCTGACCTACGGCGCTGCAGTGTCTCAGCCGCTACCCCGACACATGAAGCAGCAGCAGACTTCTTCAAGTCCGCTTCCCGAAGGCTACGCTCAGG**  
**AGCGCACCATCTTCTCAAGGACGACGGCAACTACAAGACCCCGCCGAGGTGAAGTTTCAAGGGCGACACCCTGGTGAACCGCATCGAGCTGAAGGGCATC**  
**GACTTCAAGGAGGACCGCAACACTCTGGGCAAGCTGAGTACAACACTACAACAGCCACAACCTATATCATGGCCGACAAGCAGAGAAGAGGCGCATCAAG**  
**GTGAACCTCAAGATCCCGCCACAACACTCGAGGACGGCAGCGTGCAGCTCGCCGACCACTACCAGCAGAACACCCCATCGCGCAGCGCCCTGCTGCTGCC**  
**CGACAACACTACCTGAGCACCAGTCCGCGCTGAGCAAAGACCCAGCAGAGGACCGCATACATGGTCTGCTGGAGTTCGTTGACCGCCCGCGGGATCA**  
**CTCTCGCATGGACGACTGTACAAGGATCCGGAGGGAGGATCGACTGCTGACTTGGCGGGATGTGGAAGAGAACCAGGAGCCCAATGGCTTGCCT**  
**GTGACAGCACTGCTGCTGCCACTGGCCCTGCTGCTGCACGACGCTGACCATCCAGTTCAGAGTCTCTCTCTGGACCGCACATGGAACCTGGCGAGACT**  
**GTGGAACCTGAAGTGGCAGGTCCTGCTGTCTAATCTACTTCTGGCTGTAGTGGCTGTTCCAGCCAGGAGGAGCAGCAGCTAGTCCCACCTTTCTGCTGTACC**  
**TGTACAGAACAAGCCAAAAGCAGCCGAGGGACTGGATACTCAGAGGTTTTCTGGGAAGCGCTGGGAGACACCTTCTGCTGACACTGAGTGATTTTCGGGA**  
**GAGAGAACGAAGGCTACTATTTCTGACAGCGCCCTGAGCAATCCATCATGTATTTCTCCCATTTTGTGCCCGTCTTCTGCCAGCCAAACCCACCAACTCT**  
**GCTCCAAGACCCCTACTCCGCACTACCATTGCTCACAGCCTGAGCCTGCGACCAAGCATGTAGGCCAGCTGCAGGAGGAGCAGTGCACACAAG**  
**GGGCTGGACTTCCGCTACATTTGGCACTTGGCTGGAACTTGGCTGCGTGTGCTGTGAGCCTGGTCATCACACTGTATTGCAACCACTTGA**  
**GGCGCGCCCGCTGATCAGCCTCGACTGTGCCTTCTAGTTGCCAGCCATCTGTTTGGCCCTCCCGCTGCCCTTCTTACCCCTGGAGGTGCCACTCCC**  
**ACTGTCTTCTCAATAAAGTGAAGAAATTCATCGCATCGCATTTGCTGAGTAGGTGTCATTCTTCTGGGGGGTGGGGTGGGGCAGGACAGCAAGGGGAGGATT**  
**GGGAAGACAATAGCAGGCATGCTGGGATGCGGTGGGCTCTATGGCTACGCTGCCGCTCATCGAGGGTATGGGCGTCTCCTCTTGACCTGTTTATCTAG**  
**GACTCCAACCTGAAGTTACAGATTTTTTAAAAAATGTAATAAACCCTAATTTCAACTCATTCTGTGCTATAACAGAGGAAAAACAGGGTTGGTTAAGTTTAAAC**  
**ACTGTATGGGTTTTTGAAGCAGCATGTACGTTGCCATCCCTACTCTCTTTCAGAACTCGATAAGAACAACAGGATTTATGATATTTTTCTGTTGCTGTTTTCAA**  
**ACAAAAACCCAAAGTGAATAAATTTAGAAAATTAGACCTTGTAGGCTTGTGCTTCTGAAATTTCCGCTGGGAGAAATTTAAATCTGAAGTCCGTTGAAAGTCC**  
**CTTTGTATGTAAGTGTATATAAATTTATATTTATTTAATTTAATTAATAAAGAAACCAAAACCAAAATTTAAATCTGTGGTGTGCTCTCCTATCTCTCC**  
**TGCCCCCTCCCAATGTCTAGAGAAGGCAATGTCAGGAAAAGGCTGTCTGAGGAAATTCGAGGAAAATGTTGAGTAAGAAGTGGTAATGTGGGTCTCTTGA**  
**CTGAGGGAGTTTTGTGGCTCAATGGGTTTTCTATGTAACAGAACTTTCCGCAAGGAGACACCTTTAGTCTATGATGGCATCTACCAGGCAGTGCCTCTCCATCCT**  
**AAAATAGGCAACCTCTCACAGTGTAGAGGACAACTACCTCATTGGAATGACACTGACCATTAACGACAGGTAAACCTTTATTTAGCAAGGAAGGTAAAAAT**  
**CCCCATCTAGTTTTTGTCTTCTTCTACTTCTCATTCTCTCAGTACGAAAACCTGAATTATGTAAGGAATTTGTAGAGTCAAGATGTTTATGGAAGAG**  
**CAACAATCCATCAACAGGTCAGAAGCAACAGTGAAGAACTAATAACGATGCTACAAGCAGAAATAGCGGGTTCCCTCAATGTTAAGAAAACAAAAAGTCAG**  
**GGACAGGAAGTATTCTGTTCAAAGAAGCCGCACATGTGAGCAAAAAGCCAGCAAAAAGGCCAGGAACCGTAAAAAGGCCGCGTTTCCCTGGGCTTTTCCATAGGC**  
**TCGCCCCCTGACGAGCATCACAAAAATCGACTCAAGTCAAGGTGGCGGCAACCCGACAGGATATAAAGATACAGGCGTTTCCCGCTGGAAGCTCCG**  
**TCGTCCGCTCTCTGTTCCGACCTGCCCTTACCGGATACCTGTCCGCTTCTCCCTTCGGGAAGCGTGGCGCTTCTCATAGCTCACGCTGTAGTATCT**  
**CAGTTCGGTGTAGGTGTTGCTCCAAGCTGGGCTGTGTGCACGAACCCCGCTTACGCCCCAGCCGCTGCGCCTTATCCGGTAACTATCGTCTTGTAGTCCAA**  
**CCGGTAAAGACACGACTTATCGCCACTGGCAGCAGCCACTGGTAAACAGGATTAGCAGAGCAGGATGTAGGCGGTGCTACAGAGTCTTGAAGTGGTGGCC**  
**TAACACGGCTACACTAGAAGAACAGTATTTGGTATCTGCGCTCTGTGAAGCCAGTTACCTTCCGAAAAGAGTTGGTAGCTCTTGTATCCGGCAAAACAAACCA**  
**CCGCTGTTAGCGGTGGTTTTTTTTGTTTGAAGCAGCAGATTACGCGCAGAAAAAAGGATCTCAAGAAATCCTTTGATCTTTTACGGGGTCTGACGCTCAG**  
**TGGAACGAAAACCTACGTTAAGGGATTTTGGTGTGAGATTACAAAAAGGATCTTACCTAGATCTTTTAAATTAATAAATGAAGTTTTAA**

- AmpR (orange)
- GSX2 Homology arm (blue)
- Human Ubc promoter (red)
- EGFP (green)
- tCD8 (purple)
- bGH-polyA (magenta)

**SUPPLEMENTARY TABLE 2.** gRNA target and donor vector sequence for 2<sup>nd</sup> editing.

2<sup>nd</sup> edit gRNA target: AGCGCACTGCCGCTCATCGA

**Sequence of GSX2 2nd donor vector (4818 bp):**

TACCAATGCTTAATCAGTGAGGCACCTATCTCAGCGATCTGTCTATTTTCGTTTCATCCATAGTTGCCTGACTCCCCGTCGTGTAGATAACTACGATACGGGAGGG  
CTTACCATCTGGCCCCAGTGTCTGCAATGATACCGCGAGACCCACGCTCACCGGCTCCAGATTTATCAGCAATAAACAGCCAGCCGGAAGGGCCGAGCGCAG  
AAGTGTCTCTGCAACTTTATCCGCTCCATCCAGTCTATAAATGTTGCCGGGAAGCTAGAGTAAGTAGTTCGCCAGTTAATAGTTTGCGCCAACGTTGTTGCCA  
TTGCTACAGGCATCGTGGTCTCAGCTCGTCTTTGGTATGGCTTTCATTAGCTCCGGTCCCAACGATCAAGGCCAGTTACATGATCCCCCATGTTGTGCAA  
AAAAGCGGTTAGCTCTTCGGTCTCCGATCGTTGTCAAGAAAGTGGCCGAGTGTATCACTCATGGTTATGGCAGCACTGCATAATTCTCTACTGTCA  
TGCCATCCGTAAGATGCTTTTCTGTGACTGGTACTCAACCAAGTCTTCTGAGAATAGTGTATCGGGCCAGCCGAGTTGCTCTTGGCCGGCTCAATAACG  
GGATAATACCGCGCCACATGACGAACCTTAAAAAGTGCATCATTGAAAAACGTTCTCGGGCGAAAACTCTCAAGGATCTTACCCTGTTGAGATCCAGTT  
CGATGTAACCCACTCGTGCACCAACTGATCTTACGATCTTTTACTTTACCAGCGTTTCTGGGTGAGCAAAAACAGGAAGGCAAAATGCCGCAAAAAGGG  
AATAAGGGCGACACGAAATGTTGAATCACTCACTCTTCCCTTTTCAATATTATTGAAGCATTTATCAGGGTTATTGTCTCATGAGCGGATACATATTTGAATGT  
ATTTAGAAAAATAACAAATAGGGGTTCCGCGCACATTTCCCGAAAAAGTCCACCTGACGTTAACTCGAGCCACGCACCCTGTCTGCACCCGCCACCACCTA  
CAACGTGGCGGACCCGCGGAGATTCCACTGCCTCACCATGGTAGGGCGGGGCTCTTGGGGACCTGCGCTCCGCGCTTTCGCGCTCTGGAGCAAACTT  
CCACCTCCAGTGGGAAGTGGGAGCCCGGGACAGGGTGAAGAGAGAGAGGAGGCTTTAGTGTAACTGTAGAGTCAAGGCAAGGTTCCAGCAAAAGT  
GAAGTTAGTTTGGCAGCTTCCACTCAGCTGGTGCCTTTTACTCCTAGTAGAGTGTCTCGAGTATTGCCTTATTAATACTGGGGCTTAGGGACCTCGAAC  
GTCACGGCGGAGAAAAACAGAGGTTAACTGCTTGGGATTTGGGGTGGGTGTGTTTGAACCTGTGTGGCATCCCCGCTCGGGGCGGCTAAAGCGCTTGTGACG  
TTTTGGCTAAGCTGCGGCTTCTCCGCTGGCTCAAAGGGAGGCGATCAGATAGTCAAGCCCAATCCCTCTTTAATCCTGTGACTTCCGATCCGCTCGCA  
TCGAAGACCTTTATTTGCTTTGACGCTCTTTTCTTCCCGCTAAGCAACCACGTGCCTTGAATGGGAAAGGGATACAGATGTTGCGCTGGGCTTCCCGG  
GTGGTCCCTGAAATGCGTCTGGTTAGCACATGGGTGGGAGCACCTTGCCTGAGCCTTACCTCTCTACCCTCTCTCGCCGGTCCGACGAGGCTCTGAC  
GCCAGCCAGGTACCCAATGGCAAGAGGATGAGGACGGCTTCACTAGCACGCAACTCCTGGAGCTGGAGAGAGAATTCCTTCCAACATGTACTGTCTCGA  
CTCCGGAGGATTGAAATCGCCACTTACTGAACCTGTCCGAGAAAGCAGGTGAAAACTGTGTTTTCAGAACCCGCGAGTGAAGCACAAGAAGGAGGGGAAGGG  
CAGCAGAGGAACAGTACGCGGGCTGCAAAGTGTGCTGGGAGCCAGGTGCACCTACGCGCTCCGAGGATGAGGACTCCCTGTCCGCGCTCAGCCAGC  
GATGACAAGGAGATTTCCCCCTTAGGATCCGGAAGAGGGGAGAGGCAGTCTGTTGACATGTGGAGACGTTGACGAAAAATCCAGGCCCTATGGTGTAGCAAGGG  
CGAGGAGGATAACATGGCCATCATCAAGGAGTTTATGCGCTTCAAGGTGCACATGGAGGGCTCCGTGAACGGCCACGAGTTCGAGATCGAGGGCGAGGGCG  
AGGGCCGCCCTACGAGGGCACCCAGACCGCAAGCTGAAGGTGACCAAGGGTGGCCCTGCCCTTCCCTGGGACATCCTGTCCCTCAGTTCACTGTAC  
GGCTCAAGGCCCTACGTGAAGCACCCCGCGACATCCCGACTACTTGAAGCTGTCTTCCCGAGGGCTTCAAGTGGGAGCGCGTGTAACTTCGAGGA  
CGCGCGCTGGTGACCGTGACCCAGGACTCCTCCTGCAGGACGGCGAGTTCATCTACAAGGTGAAGCTGCGCGGCACCAACTTCCCTCCGACGGCCCC  
GTAATGCAGAAGAAGCCATGGGCTGGGAGGCCCTCCTCCGAGCGGATGTACCCCGAGGACGGCGCTGAAAGGGCGAGATCAAGCAGAGGCTGAAGCTGA  
AGGACCGCGCCACTACGACGCTGAGGTCAAGACCACCTACAAGGCCAAGAGCCGCTGCAGCTGCCCGCGCTACACGCTCAACATCAAGTTGGACATC  
ACCTCCCAACAGGACTACACCATCGTGGAAACAGTACGAACCGGGCCGCACTCCACCGGGGCGCATGGAGGAGCTGTACAAGTGAGGGAGGG  
CCTCCTCCCTCACATCCCCGCTCCTGGCAGACCAGGCAACGCCAAGGCGTGGGGCACCCAGGGGCCAGAATCCTTGCTCATTGCAGTGGTCCCATCTGGA  
GAAGAAACGAACCTGGAAGTTCTGGAATGGACAAGCCGGGACCTGACCCTTCCGCTCTCCTTTGACCTGTTTATCTAGGACTCCAACCTGAAAGTTACAGATT  
TTTTAAAAAATGTAATAACCTATAAATCAACTCATTCTGTGCTATAACAGAGGAAAAACAGGGTTGGTTAAGTTAACAATGTATGGGGTTTTGAAAGCAC  
ATGTCAGTTCCCATCCCTACTCTCTTTTCCAGAACTCGATAAAGACACAGGATTTATTGATATTTTCTGTTGCTGTTTTCAAAACAAAAACCCCAAGTTGAAAAA  
ATTTAGAAAATAGACCTTGTAGGCTTGTCTTTTCAAATTTCCGCTGGGGAGAAATTTAAATCTAAGTCCGCTGGAAGTCCCTTTGTATGTGAATAGGTTTATATA  
AAATTTATATTTATTTATTTAAATAAATGAAACAAAAACAGAAATTTAAATCTGTGGTGTGTTGCTCCTCCTATCTTCCCTGCCCCCTCCTCCAATGTCTAGAG  
AAAGGCATATGCAGGAAAAAGCTGTCTGAGGAATTCGAGGAAAAATGTTGAGTAAGAACTTGGTAATGTGGGTCTCTTACTGAGGGAGTTTGTGGCTCAATGG  
GTTTTCTATGTAACAGAACTTTCCGCAAGGAGACACCTTTAGTCAATGATGCACTACACAGGAGTGCCTTCCATCCTTAAATAGGCAACCTCCTCACAGTT  
GATAGGACAAATCACTCCATTTGGAATGACACTGACCATTACGACAGGTAACCTTTATTTAGCAAGGAAGGGTAAAAATCCCCATCTAGTTTTTGTCTTCT  
CTTTCTACTTCCCTCATTCTCTCAGTACGAAAACTTGAATATGTGAAGGAAATTTAGAGTCAAGAAATGTTTAGGAAAGAGCAACAATCCATCAAAACAGGTCCAG  
AAGCAAAACAGTGGAACTTAATAACAGATGCTACAAGCAGAATTAGCGGGTTTCCCTCAATGTAAAGAAAAACAAAAAGTCAAGGACAGGAAGTATTCTGTTCAAA  
GAGCAAAAGGCCAGGAACCGTAAAAAGGCCGCTGTGCTGGCTTTTTCCATAGGCTCCGCCCCCTGACGAGCATCACAATAATCGACGCTCAAGTCAAGAGG  
TGGCGAAACCCGACAGGACTATAAAGATACAGGGCTTTCCCTGGAAGCTCCCTCGTGGCTCTCCTGTTCCGACCTGCCGCTTACCGGATACCTGTCC  
GCCCTTCCCTTCCGGAAGCGTGGCGCTTCTCATAGCTCACGCTGTAGGTATCTCAGTTTCGGTGTAGGTCGTTCCGCTCAAGCTGGGCTGTGTGCACGAAAC  
CCCCGTTTACGCCGACCGCTGCGCTTATCCGGTAACTATCGTCTTGTAGTCCAACCCGGTAAGACACGACTTATCGCCACTGGCAGCAGCCACTGGTAACA  
GGATTAGCAGAGCGAGGATGTAGGCGGTGCTACAGAGTTTCTGAAGTGGTGGCTAACTACGGCTACACTAGAAGAACAGTATTTGGTATCTGCGCTCTGCT  
GAAGCCAGTTACCTTCGAAAAAGAGTTGGTAGCTTGTATCCGGCAAAACAAACCACCGCTGGTAGCGGTGTTTTTTTGTGTTGCAAGCAGCAGATTACCGC  
AGAAAAAAGGATCTCAAGAAGATCCTTTGATCTTTTCTACGGGGTCTGACGCTCAGTGAACAGAAAACTCACGTTAAGGGATTTTGGTCATGAGATTATCAAA  
AAGGATCTTACATGATCCTTTTAAATAAAAATGAAGTTTTAAATCAATCTAAAGTA

- AmpR (orange)
- GSX2 Homology arm (blue)
- T2A (green)
- mCherry (magenta)

**SUPPLEMENTARY TABLE 3.** hiPS cell lines used in various experiments.

| <b>Experiment / Line</b>         | 2242-1 | 8858-3 | 1205-4 | 0524-1 | 0410-1 | 1927-1 | 2631-3 | 0502-3 |
|----------------------------------|--------|--------|--------|--------|--------|--------|--------|--------|
| qPCR characterization            | X      | X      | X      | X      | X      | X      | X      | X      |
| 2D neuron culture                | X      | X      | X      | X      |        |        |        |        |
| Single-cell RNAseq               | X      | X      | X      |        |        |        |        |        |
| Immunocytochemistry              | X      | X      | X      | X      | X      | X      | X      | X      |
| Dendritic spine analysis         | X      |        | X      | X      |        |        |        |        |
| Axon projection                  | X      | X      | X      | X      |        |        |        |        |
| Retrograde viral tracing         | X      |        | X      | X      |        |        |        |        |
| Optogenetics + calcium imaging   | X      | X      | X      |        | X      |        |        |        |
| Optogenetics & electrophysiology | X      |        | X      |        |        |        |        |        |
| Electrophysiology                | X      |        | X      | X      |        |        |        |        |
| Calcium imaging                  | X      | X      | X      |        | X      | X      | X      | X      |

**SUPPLEMENTARY TABLE 4.** Primers used for qPCR experiments.

| <b>Gene</b>   | <b>Forward Primer</b>   | <b>Reverse Primer</b>  |
|---------------|-------------------------|------------------------|
| <i>GAPDH</i>  | CATGAGAAGTATGACAACAGCCT | AGTCCTTCCACGATACCAAAGT |
| <i>FOXG1</i>  | AACCTGTGTTGCGCAAATGC    | AAACACGGGCATATGACCAC   |
| <i>DLX5</i>   | TTCCAAGCTCCGTTCCAGAC    | GAATCGGTAGCTGAAGACTCG  |
| <i>GSX2</i>   | ATGTCGCGCTCCTTCTATGTC   | ATGCCAAGCGGGATGAAGAAA  |
| <i>BCL11B</i> | GGTGCCTGCTATGACAAGG     | GGCTCGGACACTTTCCTGAG   |
| <i>MEIS2</i>  | ACAGCTGGAGTGGCAAAAAG    | AAATTGTCAAGCCCCCGAAC   |
| <i>RAX</i>    | GGCCATCCTGGGGTTTACC     | GGTCGAGGGGCTTCGTACT    |
| <i>HOXB4</i>  | TCCTCGTTTTTCAGCTTTGGC   | TCATTTGTTAGCGGGGTGTCG  |
| <i>NKCC1</i>  | TAAAGGAGTCGTGAAGTTTGGC  | CTTGACCCACAATCCATGACA  |
| <i>KCC2</i>   | AGGAAAGCAGTCCCTTCATCA   | GCCTCTTCATGCTCCCTACTT  |

**SUPPLEMENTARY TABLE 5.** Comparison of protocols for striatal neuron differentiation from human pluripotent stem cells.

|                                            | <b>Ma et al.,<sup>20</sup><br/>2012</b> | <b>Carri et al.,<sup>21</sup><br/>2013</b> | <b>Arber et al.,<sup>22</sup><br/>2015</b> | <b>hStrS<br/>Miura et al.</b>                            |
|--------------------------------------------|-----------------------------------------|--------------------------------------------|--------------------------------------------|----------------------------------------------------------|
| Type of culture                            | 2D                                      | 2D                                         | 2D                                         | 3D                                                       |
| Patterning                                 | SHH                                     | SHHC-25II<br>DKK1                          | Activin A                                  | Activin A<br>IWP-2<br>SR11237                            |
| Cell lines                                 | 2 hES cell lines                        | 1 hiPS and 2 hES cell lines                | 2 hiPS and 3 hES cell lines                | 5 control hiPS cell lines                                |
| Cell diversity                             | Progenitors<br>Neurons                  | Progenitors<br>Neurons                     | Progenitors<br>Neurons                     | Progenitors<br>Neurons<br>Astrocytes<br>Oligodendrocytes |
| Proportion of GABAergic neurons            | 80%                                     | 78.4%<br>(of MAP2 <sup>+</sup> cells)      | Not shown                                  | 56.9%                                                    |
| Proportion of CTIP2 <sup>+</sup> cells     | Not shown                               | 60%                                        | 50%                                        | 50%                                                      |
| Proportion of DARPP32 <sup>+</sup> neurons | 80%                                     | 20%<br>(of MAP2 <sup>+</sup> cells)        | 20-50%                                     | 30%<br>(of NeuN <sup>+</sup> cells)                      |
| Dendritic spine                            | Not shown                               | Not shown                                  | Present                                    | Present<br>(0.02 spines/ $\mu$ m at day 120-130)         |
| Resting membrane potential                 | $-46.9 \pm 2.9$ mV                      | $-43.0 \pm 4.9$ mV                         | $-44.0 \pm 1.7$ mV                         | $-75.9 \pm 1.8$ mV                                       |
| Slow-ramp depolarization                   | Not shown                               | Present                                    | Not shown                                  | Present<br>(at day 160)                                  |
| Inward rectification                       | Not shown                               | Not shown                                  | Not shown                                  | Present<br>(at day 110-120)                              |

$\pm$ , indicated s.e.m.
