# Supplementary material
Source: PubMed Central journal article supplement (PMC9042317)
Supplement: NIHMS1643626-supplement-1643626_SD_fig1.pdf [file NIHMS1643626-supplement-1643626_SD_fig1.pdf]

# SOURCE DATA 1: Unprocessed gels for Extended Data Figure 1c,f

Extended Figure 1c

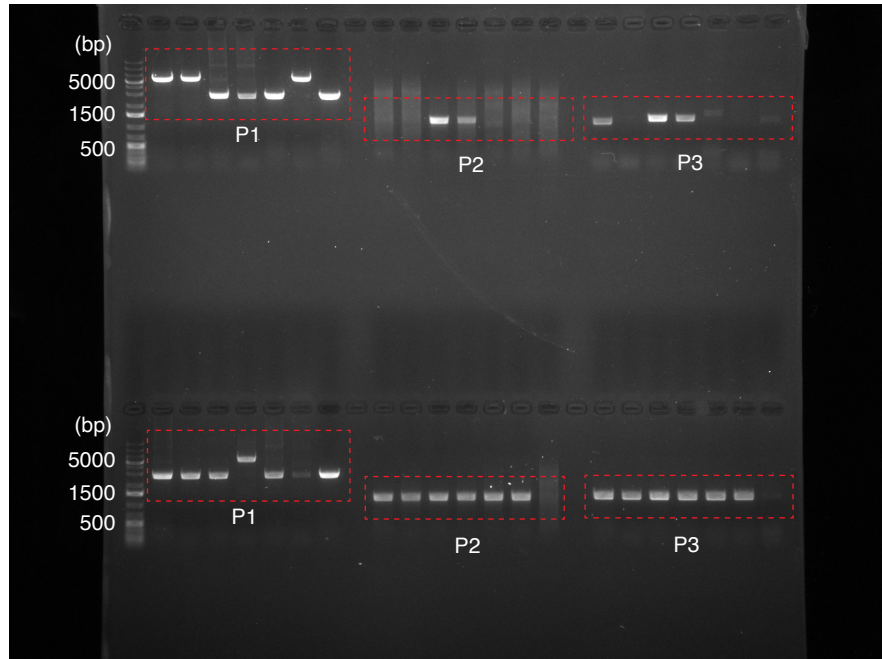

Extended Figure 1f

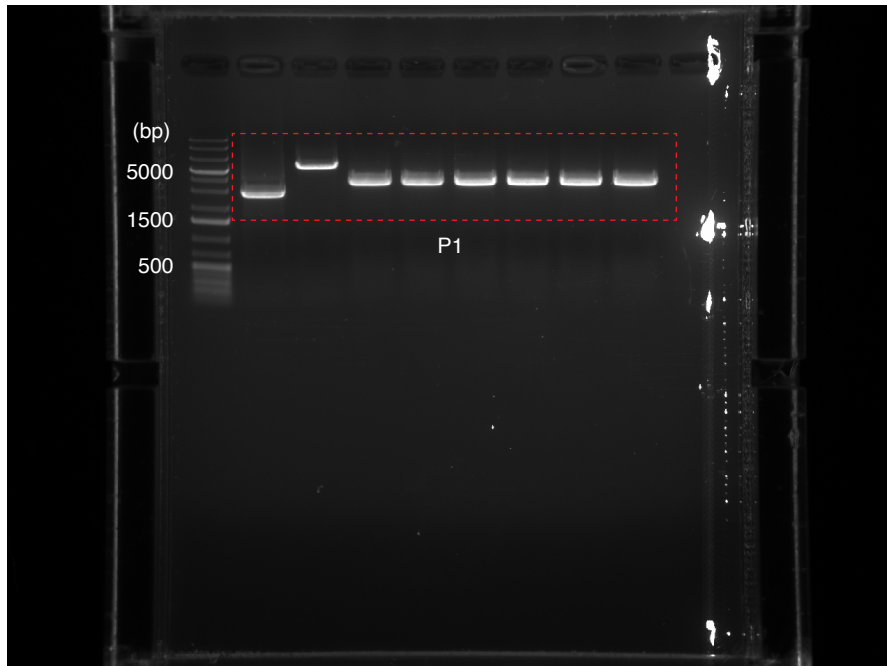

GeneRuler 1kb Plus DNA Ladder (Thermo Fisher SCIENTIFIC, SM1331) was used as a DNA size marker for all gels. The size marker indicates 20,000, 10,000, 7,000, **5,000**, 4,000, 3,000, 2,000, **1,500**, 1,000, 700, **500**, 400, 300, 200, and 75 bp from top to bottom
